# Supplementary material for: Association Between the Activity Space Exposure to Parks in Childhood and Adolescence and Cognitive Aging in Later Life
Source: Int J Environ Res Public Health. 2019 Feb 21;16(4):632. doi: 10.3390/ijerph16040632 (PMC6406333; doi:10.3390/ijerph16040632)
Supplement: Supplementary file 1 [file ijerph-16-00632-s001.pdf]

## Supplementary Materials

| Year | Home address                                                                                                                 | Local/global/personal events                                                                                                                                  | Work                                                                                          |
|------|------------------------------------------------------------------------------------------------------------------------------|---------------------------------------------------------------------------------------------------------------------------------------------------------------|-----------------------------------------------------------------------------------------------|
|      | Write the street name, suburb and town/city of the home where you lived at the start of each decade e.g. 1930, 1940, 1950... | Major events that may help you date home address. Personal events could include the likes of marriage, birth of children, major holidays, death of parents... | Write the title of your job (or your Father's job if appropriate) at the start of each decade |
| 1970 | Lutton Place, Newington, Edinburgh                                                                                           |                                                                                                                                                               | Mechanical engineer                                                                           |
| 1972 |                                                                                                                              | Oil crisis                                                                                                                                                    |                                                                                               |
| 1974 |                                                                                                                              |                                                                                                                                                               |                                                                                               |
| 1976 |                                                                                                                              | Mother Died                                                                                                                                                   |                                                                                               |
| 1978 |                                                                                                                              | Margaret Thatcher becomes prime minister                                                                                                                      |                                                                                               |
| 1980 | Lutton Place, Newington, Edinburgh                                                                                           |                                                                                                                                                               | Mechanical engineer                                                                           |
| 1982 |                                                                                                                              | Falklands War                                                                                                                                                 |                                                                                               |
| 1984 |                                                                                                                              | Married                                                                                                                                                       |                                                                                               |
| 1986 |                                                                                                                              |                                                                                                                                                               |                                                                                               |
| 1988 |                                                                                                                              | Lockerbie bombing, Hillsborough disaster                                                                                                                      |                                                                                               |
| 1990 | 28 Craigrobin Square, Constomphire, Edinburgh                                                                                | John Major becomes prime minister                                                                                                                             | Engineering consultant                                                                        |
| 1992 |                                                                                                                              |                                                                                                                                                               |                                                                                               |
| 1994 |                                                                                                                              |                                                                                                                                                               |                                                                                               |
| 1996 |                                                                                                                              | Diana Princess of Wales dies                                                                                                                                  |                                                                                               |
| 1998 |                                                                                                                              | Scottish Parliament opened                                                                                                                                    |                                                                                               |
| 2000 | 97 Stenvald Crescent, Liberton, Edinburgh                                                                                    | 9/11 attacks in New York                                                                                                                                      | Engineering consultant                                                                        |
| 2002 |                                                                                                                              |                                                                                                                                                               |                                                                                               |
| 2004 |                                                                                                                              |                                                                                                                                                               |                                                                                               |
| 2006 |                                                                                                                              |                                                                                                                                                               |                                                                                               |
| 2008 |                                                                                                                              | Retired                                                                                                                                                       |                                                                                               |
| 2010 |                                                                                                                              | Earthquake and tsunami off coastal Japan                                                                                                                      |                                                                                               |
| 2012 |                                                                                                                              |                                                                                                                                                               |                                                                                               |
| 2014 |                                                                                                                              |                                                                                                                                                               |                                                                                               |

**Figure S1.** Example of Lifegrid questionnaire. n.b. This is fictional data to preserve anonymity of the participants.

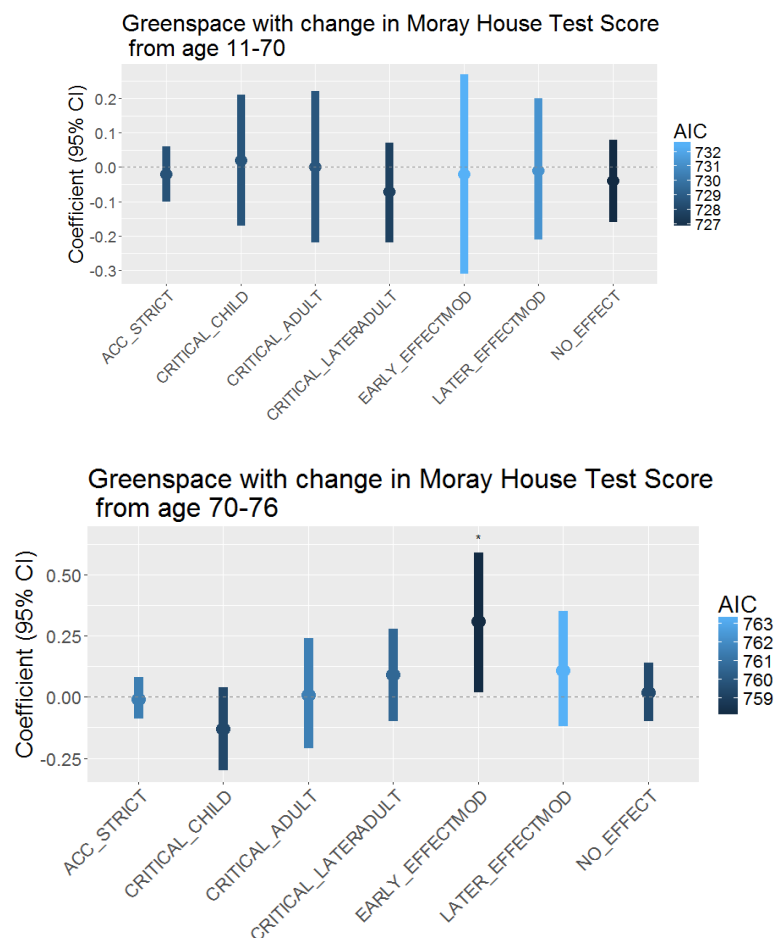

**Figure S2.** Life-course model selection.

**Table S1.** Comparison between LBC1936 analysis sample and residential life course sample.

| Characteristic                                | LBC1936 analysis sample<br>(n=281) | LBC1936 residential life course sample<br>(n=592) |
|-----------------------------------------------|------------------------------------|---------------------------------------------------|
|                                               | Mean ( $\pm$ SD); N (%)            | Mean ( $\pm$ SD); N (%)                           |
| Sex                                           |                                    |                                                   |
| Female                                        | 134 (48)                           | 279 (47)                                          |
| Father's Occupational Social class            |                                    |                                                   |
| Professional-managerial (I/II)                | 62 (22)                            | 153 (26)                                          |
| Skilled, partly skilled, unskilled (III/IV/V) | 203 (72)                           | 403 (68)                                          |
| NA                                            | 16 (6)                             | 36 (6)                                            |
| Participant's Occupational Social class       |                                    |                                                   |
| Professional-managerial (I/II)                | 151 (54)                           | 354 (60)                                          |
| Skilled, partly skilled, unskilled (III/IV/V) | 127 (45)                           | 231 (39)                                          |
| NA                                            | 3 (1)                              | 7 (1)                                             |
| Educational attainment                        |                                    |                                                   |
| Degree                                        | 31 (11)                            | 105 (18)                                          |
| Semi-professional/professional qualifications | 30 (11)                            | 78 (13)                                           |
| A-level or equivalent                         | 45 (16)                            | 97 (16)                                           |
| O-level of equivalent                         | 132 (47)                           | 223 (37)                                          |
| No qualification                              | 42 (15)                            | 88 (15)                                           |
| NA                                            | 1 (0)                              | 1 (0)                                             |
| MHT change 70-76                              | 0.01 $\pm$ 0.95                    | 0.06 $\pm$ 0.93                                   |
| NA                                            | 0 (0)                              | 27 (5)                                            |

**Table S2.** Relationship between childhood and adolescent activity space park availability and cognitive change in later life.

| Public Parks Availability <sup>a</sup>     | Change in cognitive function from age 70 to age 76 on Moray House Test |
|--------------------------------------------|------------------------------------------------------------------------|
| Large buffers                              |                                                                        |
| Childhood Activity Space * Adulthood Home  | 0.17 (-0.11 - 0.44) [0.2306]                                           |
| Adolescent Activity Space * Adulthood Home | 0.16 (-0.08 - 0.41) [0.1978]                                           |
| Moderate buffers                           |                                                                        |
| Childhood Activity Space * Adulthood Home  | 0.22 (-0.07 - 0.51) [0.1475]                                           |
| Adolescent Activity Space * Adulthood Home | 0.27 (0.00 - 0.55) [0.0496]                                            |
| Small buffers                              |                                                                        |
| Childhood Activity Space * Adulthood Home  | 0.24 (-0.07 - 0.54) [0.1270]                                           |
| Adolescent Activity Space * Adulthood Home | 0.14 (-0.16 - 0.44) [0.3597]                                           |

<sup>a</sup> Large buffers equates to buffer sizes of 1,500 m surrounding the home, 1,500 m surrounding the school and 300 m surrounding the route to school; moderate buffers equates to buffer sizes of 1,000 m surrounding the home, 1,000 m surrounding the school and 100 m surrounding the route to school; small buffers equates to buffer sizes of 500 m surrounding the home, 500 m surrounding the school and 100 m surrounding the route to school. Adulthood Home corresponds to the size of the buffer for the childhood home, i.e. for small buffers adulthood home is buffer size of 500 m. <sup>a</sup> Park availability determined as % of area within 1,000 m buffer surrounding home and school, and 200m buffer surrounding route to school <sup>b</sup> OR (95%CI) [p-value] <sup>c</sup> Adjusted for sex, father's occupational social class, people per room in childhood home, and childhood smoking, adulthood OSC, alcohol consumption and smoking status \* Interaction term.
